# Supplementary material
Source: Springer Nature journal article supplement (https://www.springermedizin.de/resource/supplementary/13256_2011_1909_MOESM3_ESM.pdf/9648684)

A

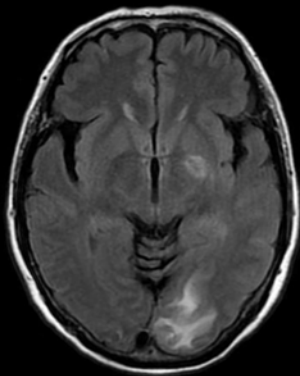

B

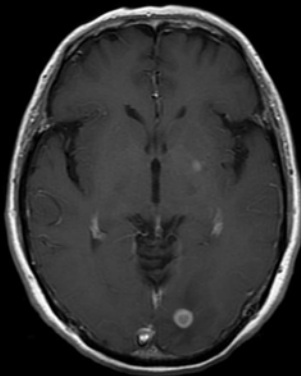

C

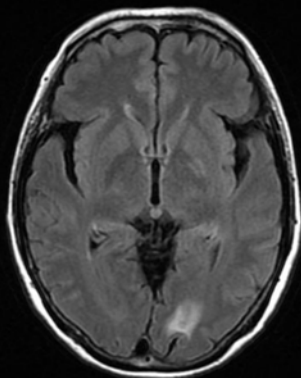

D

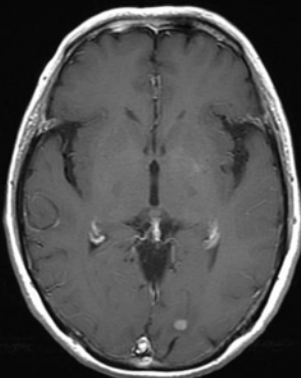

Supplement: MOESM3 [file 9648684]
